# Supplementary material for: Elucidating the Efficacy of Vaccination against Vibriosis in Lates calcarifer Using Two Recombinant Protein Vaccines Containing the Outer Membrane Protein K (r-OmpK) of Vibrio alginolyticus and the DNA Chaperone J (r-DnaJ) of Vibrio harveyi
Source: MDPI journal article supplement (doi:10.3390/vaccines8040660), 2020-11-06
Supplement: s1 [file s1]

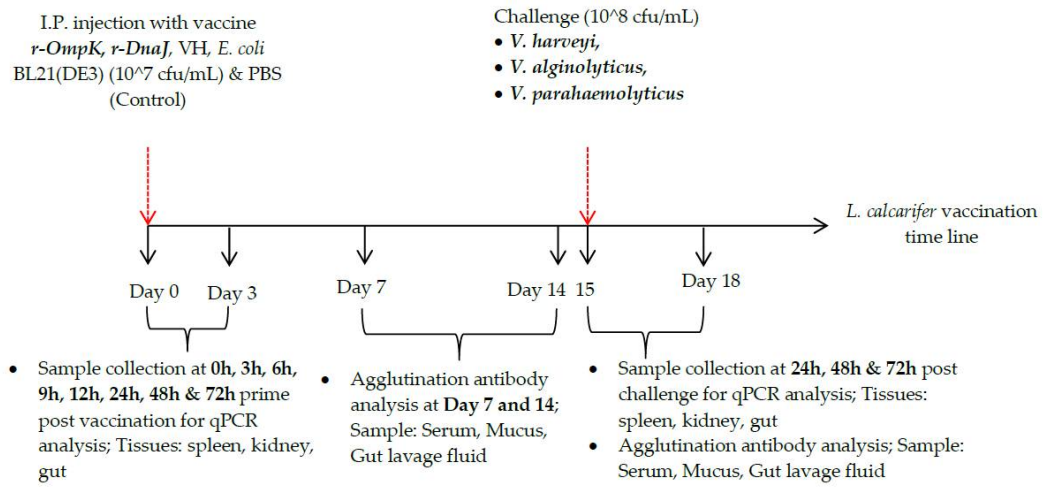

**Figure S1.** The timeline study of in vivo pathogenicity and safety level in *Lates calcarifer*.

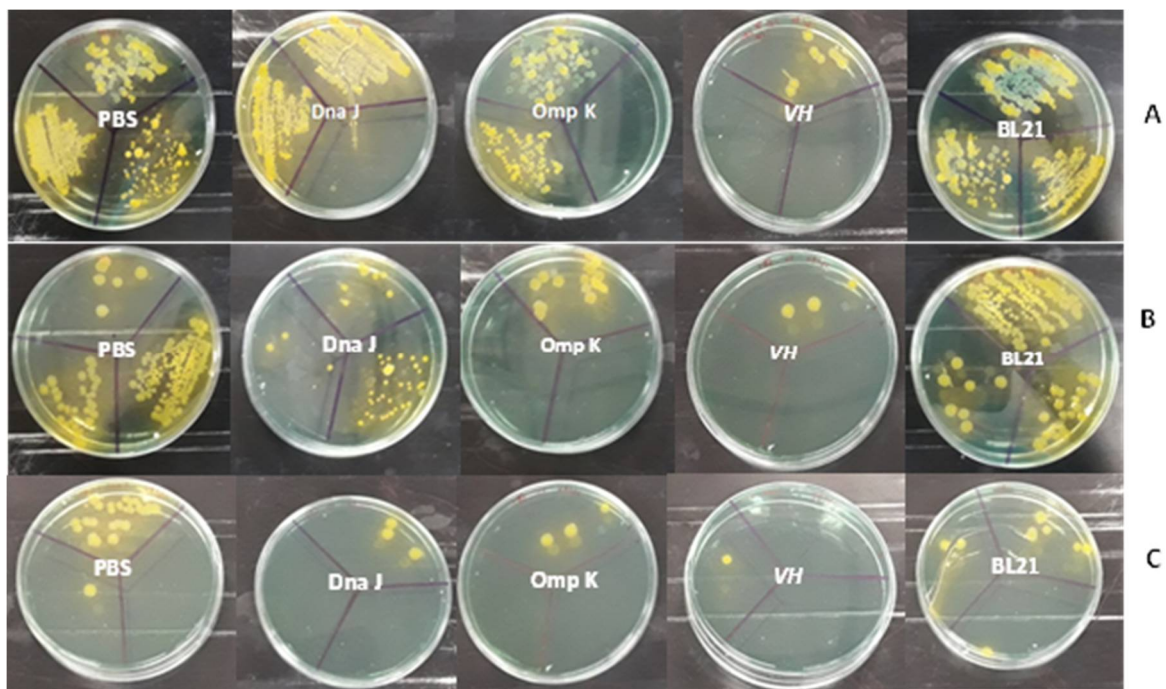

**Figure S2.** Growth of yellow colonies on thiosulfate-citrate-bile salts-sucrose (TCBS) agar from culture of isolates from spleen, intestine and kidney of challenged fish of (A) *V. harveyi*, (B) *V. alginolyticus* and (C) *V. parahaemolyticus*.
